# Supplementary material for: Synthesis of Network Polymers by Means of Addition Reactions of Multifunctional-Amine and Poly(ethylene glycol) Diglycidyl Ether or Diacrylate Compounds
Source: PubMed Central journal article supplement (PMC7570363; doi:10.3390/polym12092047), 2020-09-08
Supplement: polymers-12-02047-s001.pdf [file polymers-12-02047-s001.pdf]

Supplementary Material

# Synthesis of network polymers by means of addition reactions of multifunctional-amine and poly(ethylene glycol) diglycidyl ether or diacrylate compounds

Naofumi Naga <sup>1,2\*</sup>, Mitsusuke Satoh <sup>2</sup>, Kensuke Mori <sup>1</sup>, Hassan Nageh <sup>3</sup>, and Tamaki Nakano <sup>3,4</sup>

<sup>1</sup> Department of Applied Chemistry, College of Engineering, Shibaura Institute of Technology, 3-7-5 Toyosu, Koto-ku, Tokyo 135-8548, Japan

<sup>2</sup> Graduate School of Science & Engineering, Shibaura Institute of Technology, 3-7-5 Toyosu, Koto-ku, Tokyo 135-8548, Japan

<sup>3</sup> Institute for Catalysis and Graduate School of Chemical Sciences and Engineering, Hokkaido University, N 21, W 10, Kita-ku Sapporo 001-0021, Japan

<sup>4</sup> Integrated Research Consortium on Chemical Sciences, Institute for Catalysis, Hokkaido University, N 21, W 10, Kita-ku Sapporo 001-0021, Japan

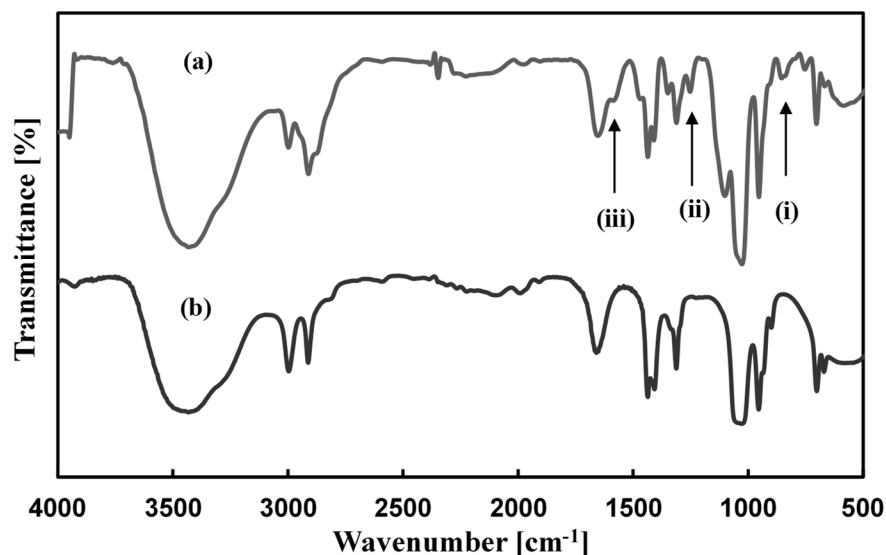

**Figure S1.** FT-IR spectra of PEI-PEGDE400 reaction system Case 2, (a) before reaction, and (b) after reaction at 90 °C for 24 h, solvent: DMSO, monomer concentration: 30 wt%.

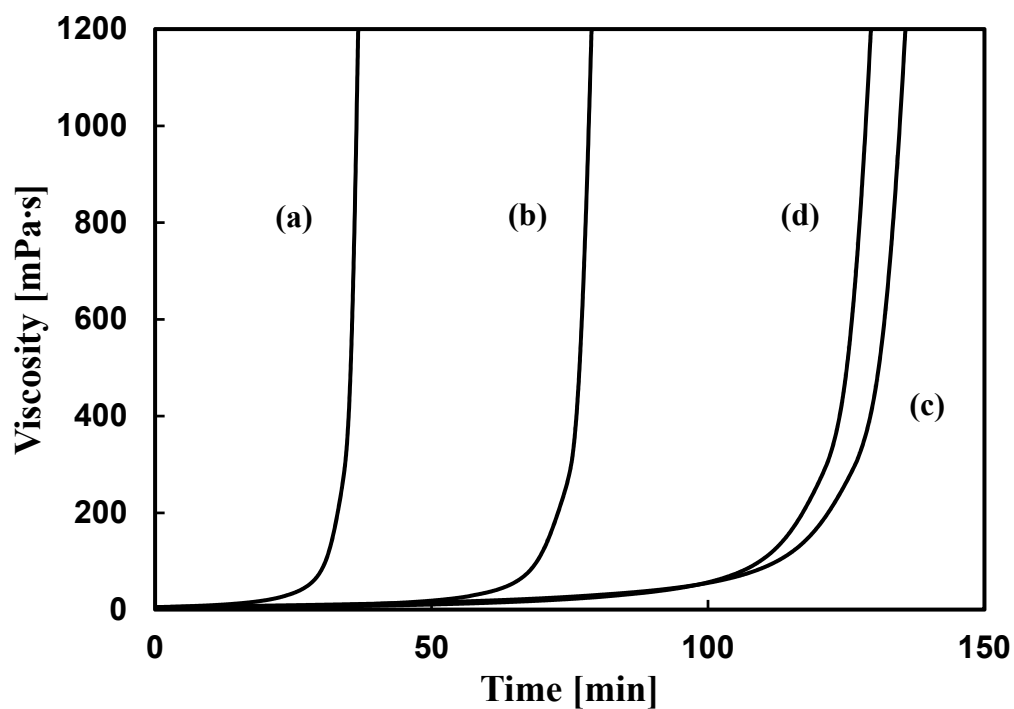

**Figure S2.** Time evolution of viscosity of PEI-PEGDE400 reaction systems: (a) Case 1, (b) Case 2, PEI-PEGDE1000 reaction system: (c) Case 1, DETA-PEGDE400 reaction system: (d) Case 1, solvent: H<sub>2</sub>O, monomer concentration: 30 wt%.

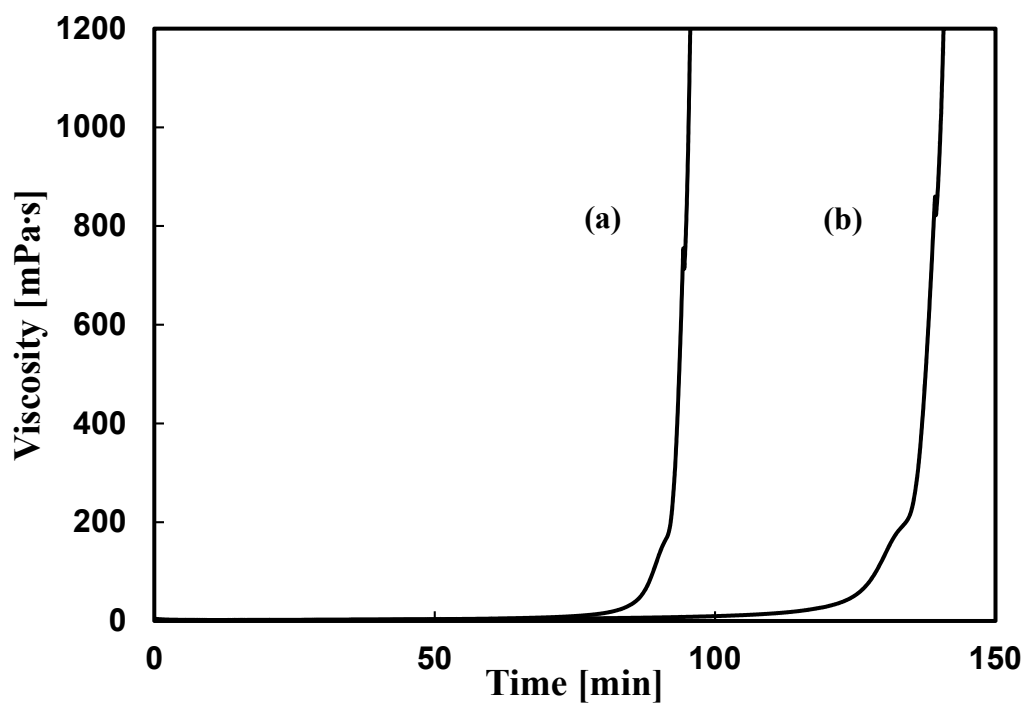

**Figure S3.** Time evolution of viscosity of PEI-PEGDE400 reaction systems: (a) Case 1, (b) Case 2, solvent: DMSO, monomer concentration: 30 wt%.

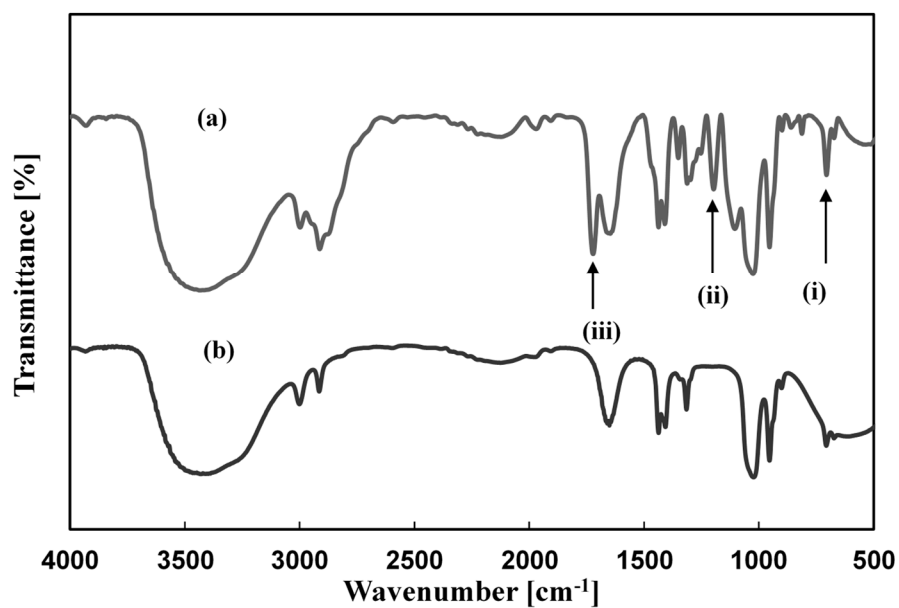

**Figure S4.** FT-IR spectra of PEI-PEGDA400 reaction system (a) before reaction, and (b) after reaction, Case 2, solvent: DMSO, monomer concentration: 30 wt%.

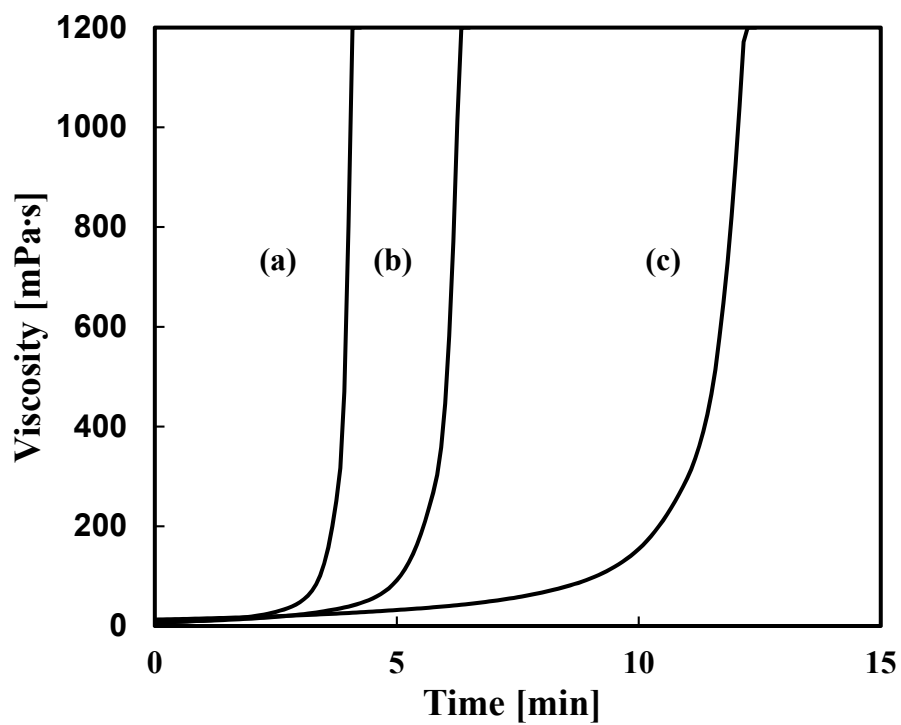

**Figure S5.** Time evolution of viscosity of (a) PEI-PEGDA200 reaction system Case 1, (b) PEI-PEGDA400 reaction system Case1, (c) PEI-PEGDA600 reaction system Case 1, solvent: DMSO, monomer concentration: 30 wt%.

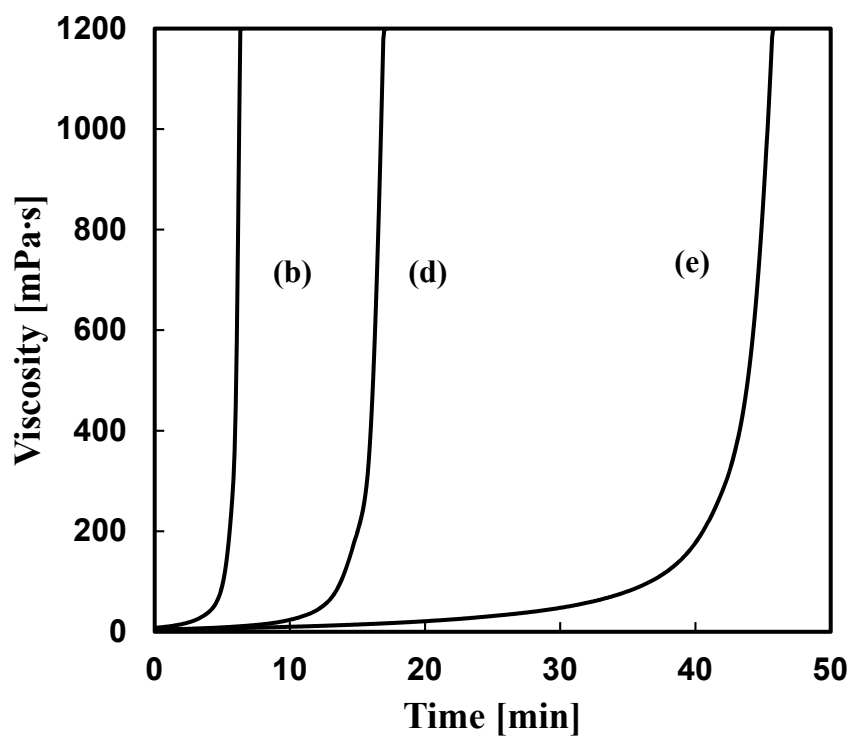

**Figure S6.** Time evolution of viscosity of PEI-PEGDA400 reaction system: (b) Case 1, (d) Case 2, DETA-PEGDA400 reaction system: (e) Case 1, solvent: DMSO, monomer concentration: 30 wt%.

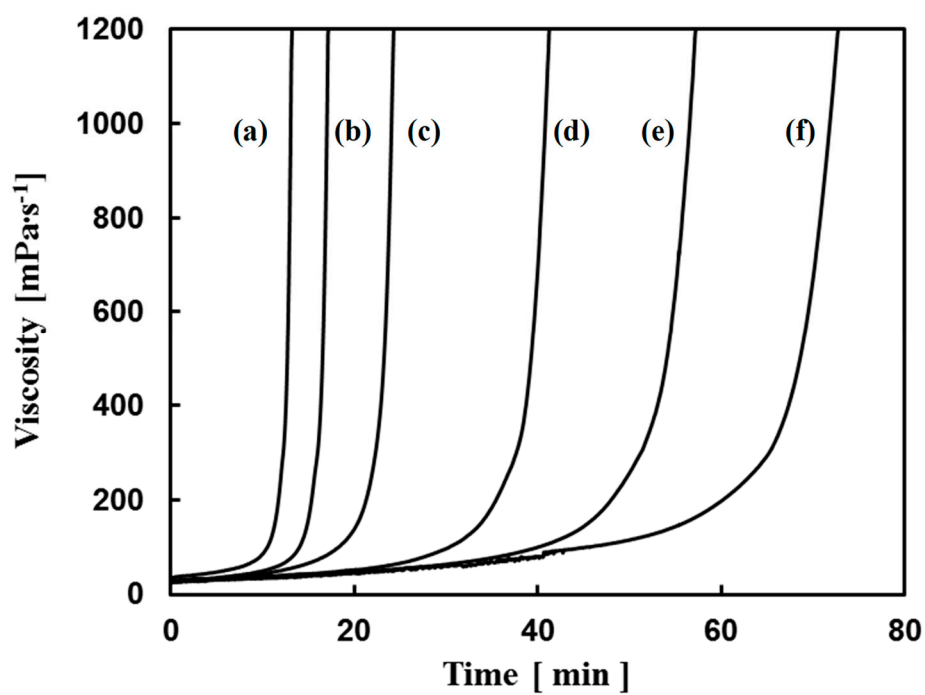

**Figure S7.** Time-evolution of (a) PEI-PEGDA400, (b) PEI-PEGDA600 and (c) PEI-PEGDA1000 reaction systems Case 1, (d) PEI-PEGDA400, (e) PEI-PEGDA600 and (f) PEI-PEGDA1000 reaction systems Case 2, solvent: EtOH, monomer concentration: 30 wt%.

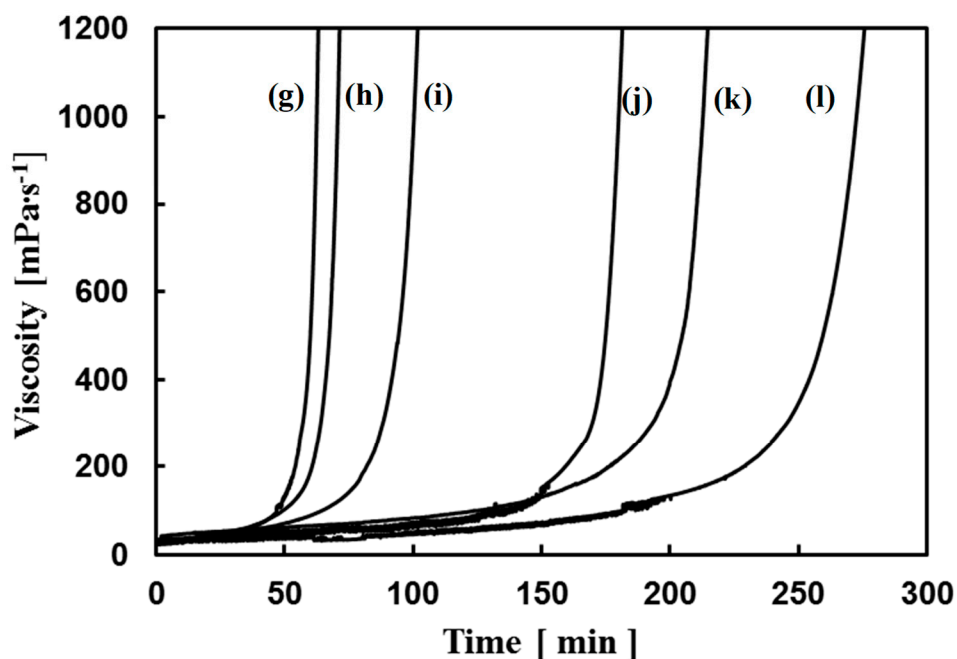

**Figure S8.** Time-evolution of viscosity of DETA-PEGDA reaction systems, (g) DETA-PEGDA400, (h) DETA-PEGDA600, and (i) DETA-PEGDA1000, Case 1, (j) DETA-PEGDA400, (k) DETA-PEGDA600, and (l) DETA-PEGDA1000, Case 2, solvent: EtOH, monomer concentration: 30 wt%.

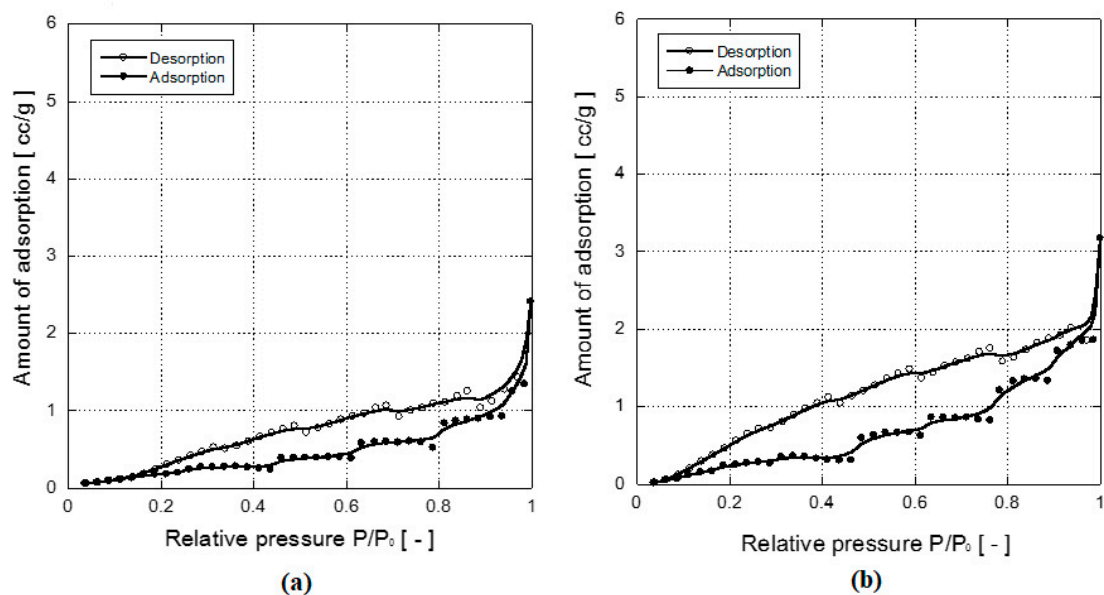

**Figure S9.** Adsorption isotherm of (a) PEI-PEGDA200 and (b) DETA-PEGDA200 porous polymers, monomer concentration in the reaction solution: 30 wt%, feed molar ratio:  $[\text{PEI}]/[\text{PEGDA200}] = 2/14$  mol/mol,  $[\text{DETA}]/[\text{PEGDA200}] = 2/5$  mol/mol (Case 2).

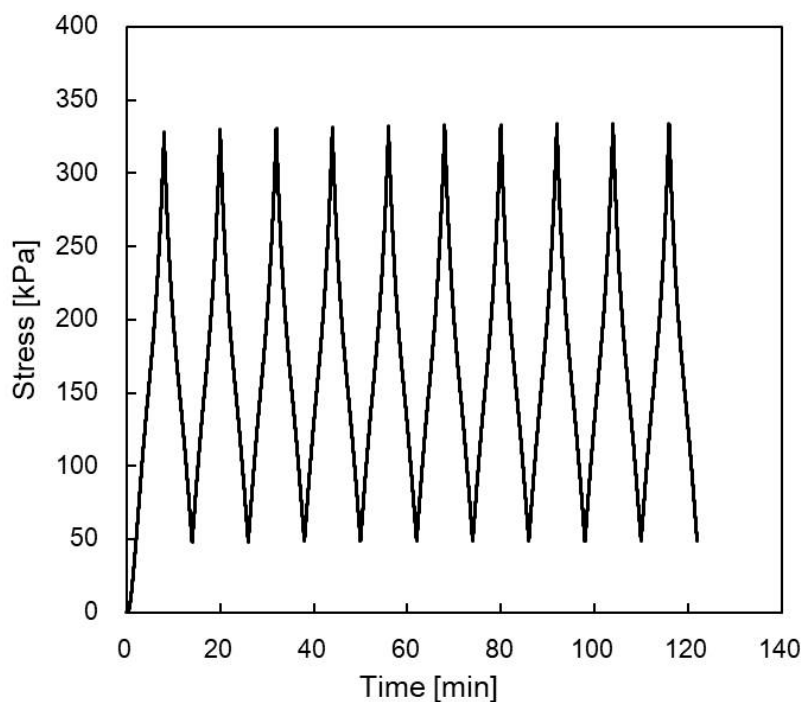

**Figure S10.** Cycle test of DETA-PEGDA200 porous polymer, monomer concentration in the reaction solution: 30 wt%, feed molar ratio of DETA/PEGDA200: 2/5 Case 2), sample size: 10 mm cube, upper point: 4 mm – lower point: 1 mm, compression and release rate: 0.5 mm/min, cycle: 10.

**Table S1.** Affinity of PEG and solvents calculated by Hansen solubility parameters.

| Solvent         | dD <sub>2</sub><br>MPa <sup>1/2</sup> | dP <sub>2</sub><br>MPa <sup>1/2</sup> | dH <sub>2</sub><br>MPa <sup>1/2</sup> | R <sub>a</sub> <sup>a</sup><br>MPa <sup>1/2</sup> |
|-----------------|---------------------------------------|---------------------------------------|---------------------------------------|---------------------------------------------------|
| hexane          | 14.9                                  | 0                                     | 0                                     | 15.3                                              |
| EtOH            | 15.8                                  | 8.8                                   | 19.4                                  | 19.2                                              |
| acetone         | 15.5                                  | 10.4                                  | 7.0                                   | 10.2                                              |
| toluene         | 18.0                                  | 1.4                                   | 2.0                                   | 10.6                                              |
| water           | 15.5                                  | 16.0                                  | 42.3                                  | 41.3                                              |
| DMSO            | 18.4                                  | 16.4                                  | 10.2                                  | 9.9                                               |
| dichloromethane | 17.0                                  | 7.3                                   | 7.1                                   | 8.6                                               |
| chloroform      | 17.8                                  | 3.1                                   | 5.7                                   | 9.8                                               |

<sup>a</sup> Hansen distance:  $R_a = \{4 \cdot (dD_1 - dD_2)^2 + (dP_1 - dP_2)^2 + (dH_1 - dH_2)^2\}^{1/2}$

PEG:  $dD_1 = 20.0$ ,  $dP_1 = 11.2$ ,  $dH_1 = 2.3$  (MPa<sup>1/2</sup>)
